# Supplementary material for: Evidence of Extensive Circulation of Yersinia enterocolitica in Rodents and Shrews in Natural Habitats from Retrospective and Perspective Studies in South Caucasus
Source: MDPI journal article supplement (doi:10.3390/pathogens10080939), 2021-07-26
Supplement: s1 [file s1]

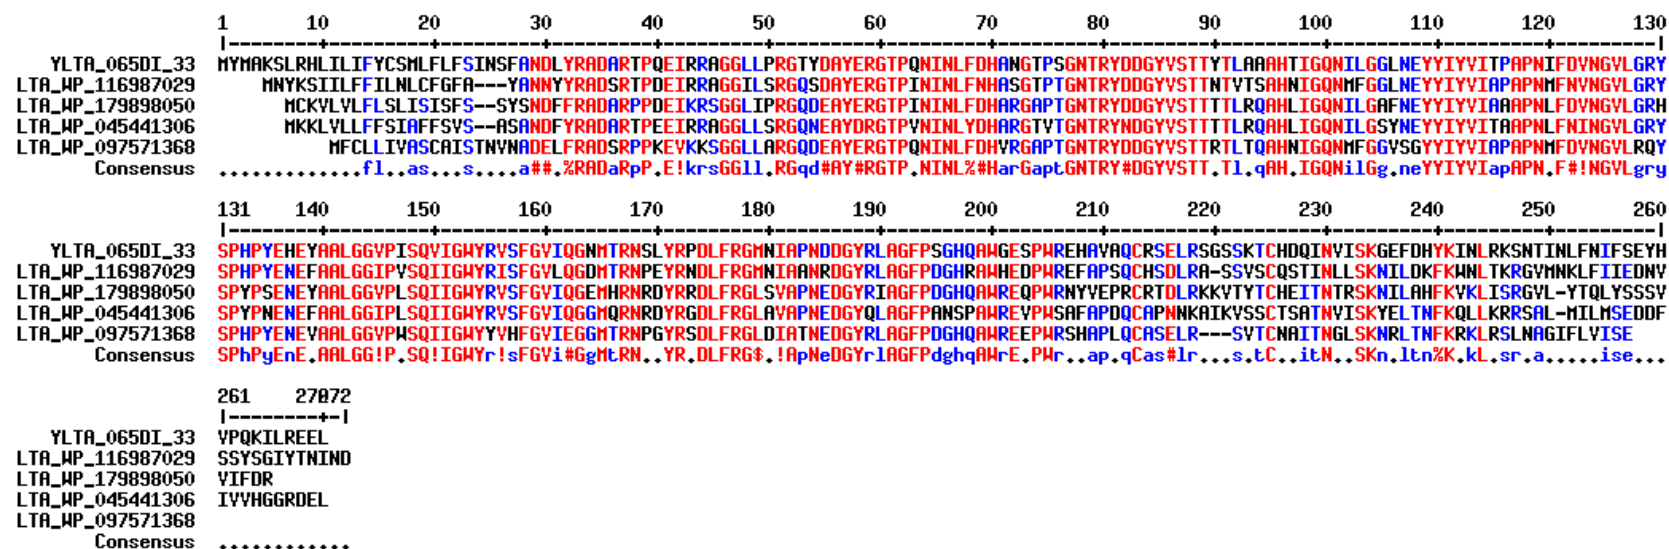

**Figure S1.** Alignment of heat-labile enterotoxin, A chain (YLTA) of *Y. enterocolitica* 18E17 065 D I -33 (YLTA\_065DI\_33) with LTA homologs from other microorganisms deposited in GenBank, such as *E. coli* (WP\_116987029, 66/80%), *Providencia alcalifaciens* (WP\_179898050, 68/80%), *Cronobacter* (WP\_097571368, 62/75%), and *Citrobacter* sp. S-77 (WP\_045441306, 60/76%). GenBank accession numbers for these LTAs, as well as percent of their identity/similarity with YLTA are shown in parentheses. The alignment was visualized in MultAlin (<http://multalin.toulouse.inra.fr/multalin/>).

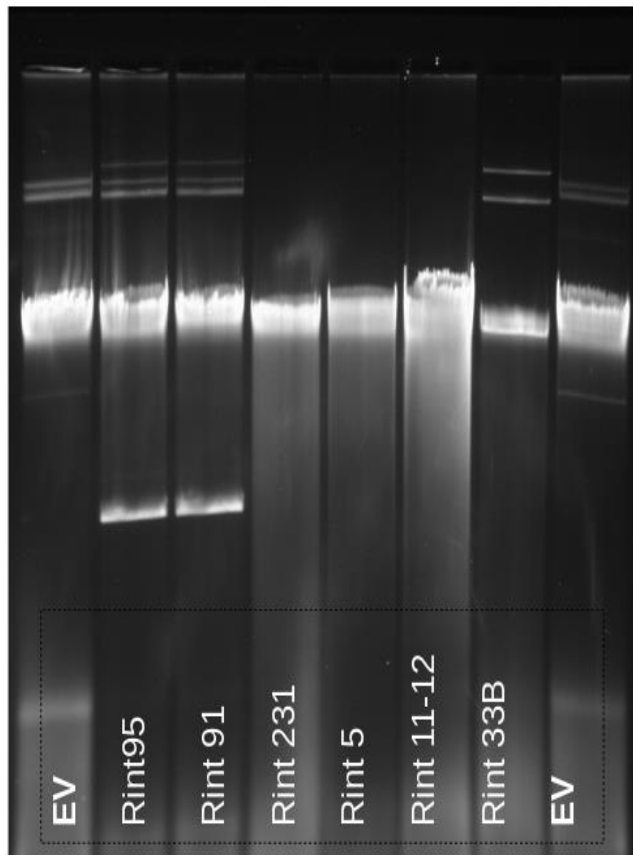

**Figure S2.** Plasmid profiles of the strains obtained by Kado & Liu method. *Yersinia pestis* EV76 (EV) vaccine strain containing reference plasmids with molecular weight 101, 70.5, and 9.5 kb. *Y. enterocolitica* strains 18E17 065 D I Rint-95 (Rint95), 18E17 065 D I Rint-91 (Rint91), B18 Rint -231 (Rint231), LcENCDC Rint 5 (Rint5), 18ENCDC AsAtc Rint - 11-12 (Rint11-12), and 18E17 065 D I -33 (Rint33B).

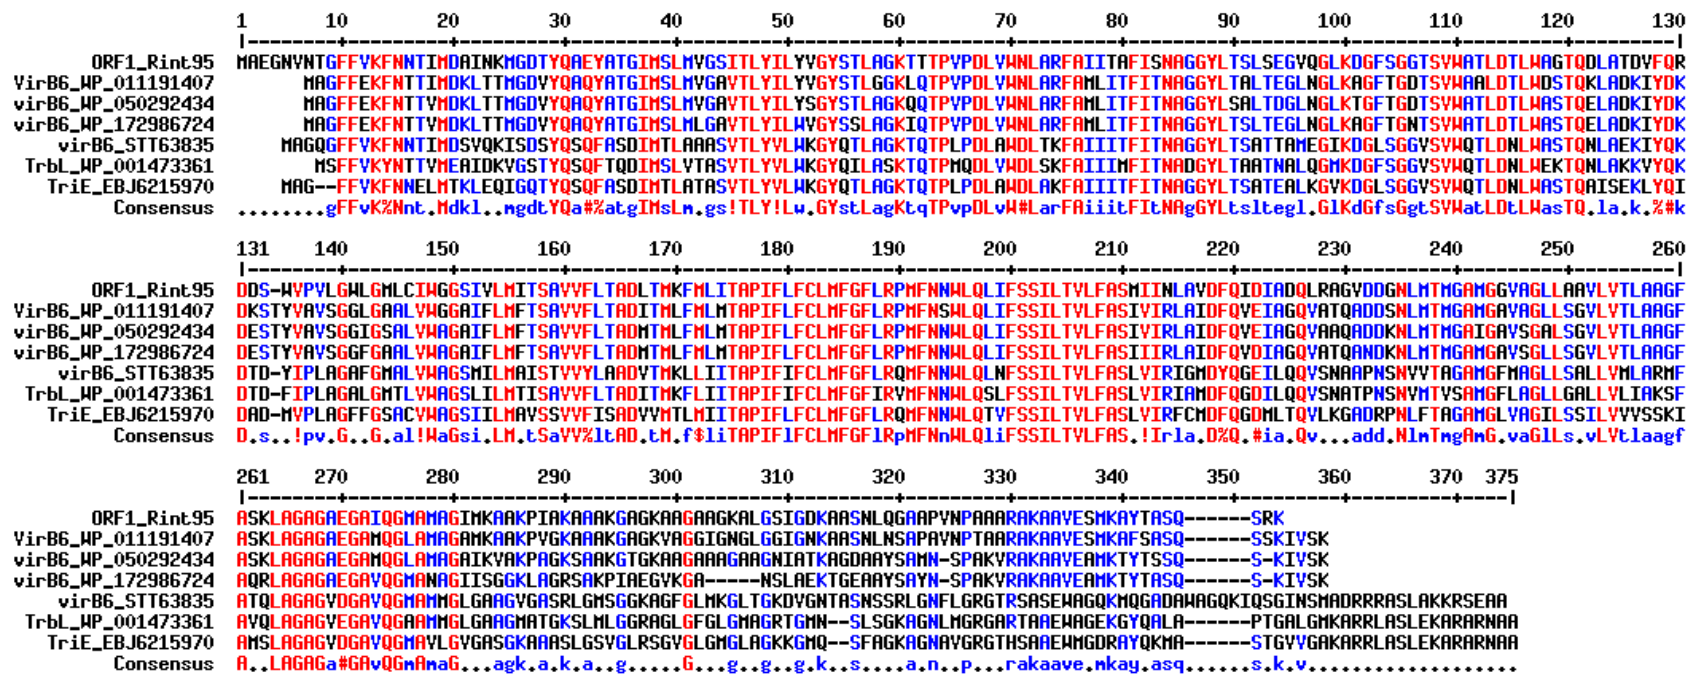

**Figure S3.** Alignment of ORF1 of small plasmid (Contig\_23, 4,543 bp) of *Y. enterocolitica* 18E17 065 D I Rint-95 (ORF1\_Rint95) with the type 4 secretion system VirB6 conjugal transfer protein from the microorganisms deposited in GenBank, such as *Yersinia pseudotuberculosis* (WP\_011191407, 74/83%), *Yersinia kristensenii* (WP\_050292434, 70/82%), *Yersinia massiliensis* (WP\_172986724, 66/78%), *Klebsiella pneumoniae* NCTC9632 (STT63835, 57/75%), *E.coli* (WP\_001473361, 54/70%), and *Salmonella enterica* PNUSAS047895 (EBJ6215970, 51/67%). GenBank accession numbers for these proteins, as well as percent of their identity/similarity with the ORF1\_Rint95 are shown in parentheses. The alignment was visualized in Multalin (<http://multalin.toulouse.inra.fr/multalin/>).

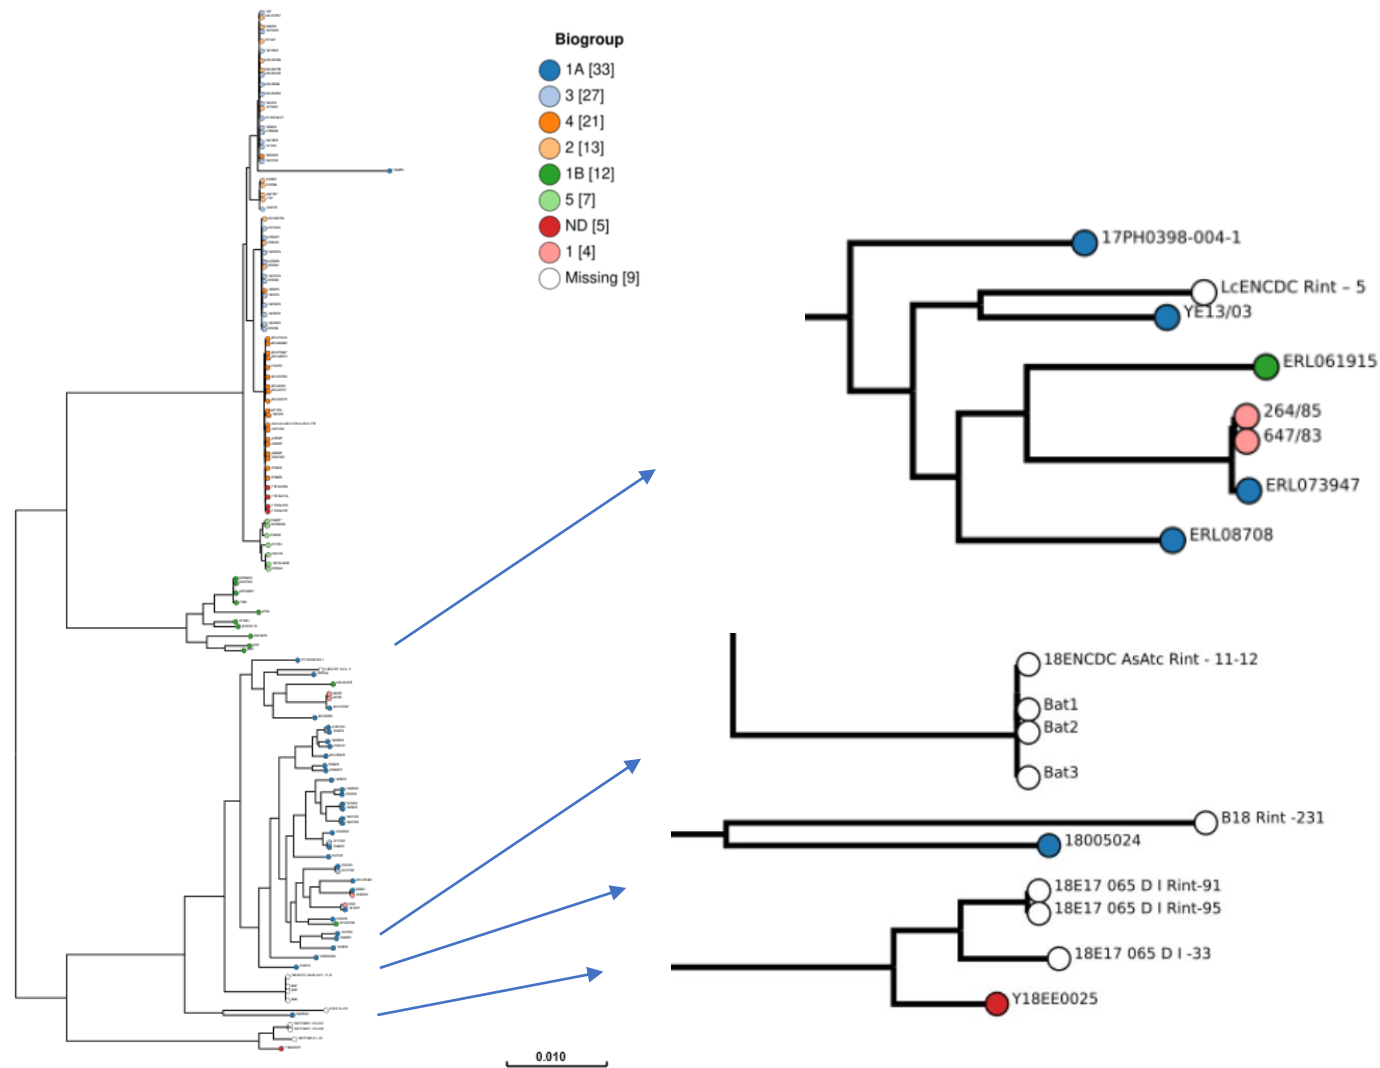

**Figure S4.**

Maximum likelihood- phylogenetic SNP-based tree constructed in Enterobase showing the position of sequenced *Y. enterocolitica* isolates from Georgia in the context of worldwide *Y. enterocolitica* biogroup distribution. These Georgian *Y. enterocolitica* isolates were 18E17 065 D I Rint-95, 18E17 065 D I Rint-91, B18 Rint -231, LcENCDC Rint 5, 18ENCDC AsAtc Rint - 11-12, and 18E17 065 D I -33. Previously described *Y. enterocolitica* isolates from dead bats (Imnadze et.al., 2020) designated as Bat1, Bat2 and Bat3. The tips are colored according to the biogroups of the isolates.

**Table S1.** *Yersinia enterocolitica* strains phenotypic characterization by API20E

| No | Strain ID                | ONPG Beta-Galactosidase | ADH Arginine DiHydrolase | LDC Lysine DeCarboxylase | ODC Ornithin DeCarboxylase | CIT Citrate Simmons | H <sub>2</sub> S Production | URE Urease | TDA Tryptophan DesAminase | IND Indole | VP Voges Proskauer | GEL Gelatine Hydrolyse | GLU Glucose | MAN Mannitol | INO Inositol | SOR Sorbitol | RHA Rhamnose | SAC Sucrose | MEL Melibiose | AMY Amygladin | ARA Arabinose |
|----|--------------------------|-------------------------|--------------------------|--------------------------|----------------------------|---------------------|-----------------------------|------------|---------------------------|------------|--------------------|------------------------|-------------|--------------|--------------|--------------|--------------|-------------|---------------|---------------|---------------|
| 1  | 18ENCDC AsAtc Rint 11-12 | neg                     | neg                      | neg                      | pos                        | neg                 | neg                         | pos        | neg                       | pos        | pos                | neg                    | pos         | pos          | pos          | pos          | neg          | pos         | neg           | pos           | pos           |
| 2  | LcENCDC Rint - 5         | neg                     | neg                      | neg                      | neg                        | neg                 | neg                         | pos        | neg                       | pos        | pos                | neg                    | pos         | pos          | pos          | pos          | neg          | pos         | neg           | neg           | neg           |
| 3  | 18E17 065 D I -33        | neg                     | neg                      | neg                      | pos                        | neg                 | neg                         | pos        | neg                       | pos        | pos                | neg                    | pos         | pos          | pos          | pos          | neg          | pos         | neg           | pos           | pos           |
| 4  | 18E17 065 D I Rint-95    | neg                     | neg                      | neg                      | pos                        | neg                 | neg                         | pos        | neg                       | pos        | pos                | neg                    | pos         | pos          | pos          | pos          | neg          | pos         | neg           | pos           | pos           |
| 5  | 18E17 065 D I Rint-91    | neg                     | neg                      | neg                      | pos                        | neg                 | neg                         | pos        | neg                       | pos        | pos                | neg                    | pos         | pos          | pos          | pos          | neg          | pos         | neg           | pos           | pos           |
| 6  | B18 Rint -231            | pos                     | neg                      | neg                      | pos                        | neg                 | neg                         | pos        | neg                       | pos        | pos                | neg                    | pos         | pos          | pos          | pos          | neg          | pos         | neg           | pos           | pos           |
| 7  | Lc18Encdc Rint -2        | pos                     | neg                      | neg                      | neg                        | neg                 | neg                         | pos        | neg                       | pos        | pos                | neg                    | pos         | pos          | pos          | pos          | neg          | pos         | neg           | pos           | pos           |
| 8  | LcEncdc Rint - 4         | neg                     | neg                      | neg                      | neg                        | neg                 | neg                         | pos        | neg                       | pos        | pos                | neg                    | pos         | pos          | pos          | pos          | neg          | pos         | neg           | neg           | neg           |
| 9  | 18E17 065 D I -36        | neg                     | neg                      | neg                      | pos                        | neg                 | neg                         | pos        | neg                       | pos        | pos                | neg                    | pos         | pos          | pos          | pos          | neg          | pos         | neg           | pos           | pos           |
| 10 | 18E17 065 D I -86        | pos                     | neg                      | neg                      | pos                        | neg                 | neg                         | pos        | neg                       | pos        | pos                | neg                    | pos         | pos          | pos          | pos          | neg          | pos         | neg           | pos           | pos           |
| 11 | 18E17 065 D I -29        | pos                     | neg                      | neg                      | pos                        | neg                 | neg                         | pos        | neg                       | pos        | pos                | neg                    | pos         | pos          | pos          | pos          | neg          | pos         | neg           | pos           | pos           |

|    |                           |     |     |     |     |     |     |     |     |     |     |     |     |     |     |     |     |     |     |     |     |
|----|---------------------------|-----|-----|-----|-----|-----|-----|-----|-----|-----|-----|-----|-----|-----|-----|-----|-----|-----|-----|-----|-----|
| 12 | 18E17 065 D I -108        | neg | neg | neg | pos | neg | neg | pos | neg | pos | pos | neg | pos | pos | pos | pos | neg | pos | neg | pos | pos |
| 13 | 18E17 065 D I Rint-63     | pos | neg | neg | pos | neg | neg | pos | neg | pos | pos | neg | pos | pos | pos | pos | neg | pos | neg | pos | pos |
| 14 | 18E17 065 D I Rint-88     | neg | neg | neg | pos | neg | neg | pos | neg | pos | pos | neg | pos | pos | pos | pos | neg | pos | neg | pos | pos |
| 15 | 18E17 065 D I Rint-107    | pos | neg | neg | neg | neg | neg | pos | neg | pos | pos | neg | pos | pos | pos | pos | neg | pos | neg | pos | pos |
| 16 | 18EAs P0094 I Rint - 8    | pos | neg | neg | pos | neg | neg | pos | neg | pos | pos | neg | pos | pos | pos | pos | neg | pos | neg | pos | pos |
| 17 | 18EAs P0094 I Rint - 4    | pos | neg | neg | pos | neg | neg | pos | neg | pos | neg | neg | pos | pos | pos | pos | neg | pos | neg | pos | pos |
| 18 | 18EAs P0094 I Rint - 19   | pos | neg | neg | pos | neg | neg | pos | neg | pos | neg | neg | pos | pos | pos | pos | neg | pos | neg | pos | pos |
| 19 | 18EAs P0094 I Rynt - 9    | pos | neg | neg | pos | neg | neg | pos | neg | pos | pos | neg | pos | pos | pos | pos | neg | pos | neg | pos | pos |
| 20 | 18ESachxP0094 I Rint - 8  | pos | neg | neg | pos | neg | neg | pos | neg | pos | pos | neg | pos | pos | pos | pos | neg | pos | neg | pos | pos |
| 21 | 18ESachxP0094 I Rint - 14 | pos | neg | neg | pos | neg | neg | pos | neg | pos | neg | neg | pos | pos | pos | pos | neg | pos | neg | pos | pos |
| 22 | 18ESachxP0094 I Rint - 7  | pos | neg | neg | neg | neg | neg | pos | neg | pos | pos | neg | pos | pos | pos | pos | neg | pos | neg | pos | pos |
| 23 | 18ESachxP0094 I Rint - 22 | neg | neg | neg | pos | neg | neg | pos | neg | pos | pos | neg | pos | pos | pos | pos | neg | pos | neg | pos | pos |
| 24 | 18ESachxP0094 I Rint - 25 | neg | neg | neg | pos | neg | neg | pos | neg | pos | pos | neg | pos | pos | pos | pos | neg | pos | neg | pos | pos |
| 25 | 18ESachxP0094 I Rint - 30 | neg | neg | neg | neg | neg | neg | pos | neg | pos | pos | neg | pos | pos | pos | pos | neg | pos | neg | neg | neg |
| 26 | 18E17 065 D II Rint -33   | neg | neg | neg | neg | neg | neg | pos | neg | pos | pos | neg | pos | pos | pos | pos | neg | pos | neg | neg | neg |
| 27 | 18E17 065 D II Rint-36    | neg | neg | neg | neg | neg | neg | pos | neg | pos | pos | neg | pos | pos | pos | pos | neg | pos | neg | neg | neg |

|    |                           |     |     |     |     |     |     |     |     |     |     |     |     |     |     |     |     |     |     |     |     |
|----|---------------------------|-----|-----|-----|-----|-----|-----|-----|-----|-----|-----|-----|-----|-----|-----|-----|-----|-----|-----|-----|-----|
| 28 | 18E17 065 D II Rint-106   | neg | neg | neg | pos | neg | neg | pos | neg | pos | pos | neg | pos | pos | pos | pos | neg | pos | neg | pos | pos |
| 29 | 18E17 065 D II Rint -14   | pos | neg | neg | pos | neg | neg | pos | neg | pos | pos | neg | pos | pos | pos | pos | neg | pos | neg | pos | pos |
| 30 | 18E17 065 D II Rint-104   | pos | neg | neg | pos | neg | neg | pos | neg | pos | pos | neg | pos | pos | pos | pos | neg | pos | neg | pos | pos |
| 31 | 18Encdc Poti Rint-3       | neg | neg | neg | pos | neg | neg | pos | neg | pos | pos | neg | pos | pos | pos | pos | neg | pos | neg | pos | pos |
| 32 | 18E Tsk P0094 Rint - 5    | neg | neg | neg | neg | neg | neg | pos | neg | pos | pos | neg | pos | pos | pos | pos | neg | pos | neg | neg | neg |
| 33 | 18E17 065 D III Rint -198 | neg | neg | neg | pos | neg | neg | pos | neg | pos | pos | neg | pos | pos | pos | pos | neg | pos | neg | pos | pos |
| 34 | B18 Rint -246             | pos | neg | neg | pos | neg | neg | pos | neg | pos | pos | neg | pos | pos | pos | pos | neg | pos | neg | pos | pos |
| 35 | B18 Rint -263             | neg | neg | neg | pos | neg | neg | pos | neg | pos | pos | neg | pos | pos | pos | pos | neg | pos | neg | pos | pos |
| 36 | B18 Rint -247             | pos | neg | neg | pos | neg | neg | pos | neg | pos | neg | neg | pos | pos | pos | pos | neg | pos | neg | pos | pos |
| 37 | 18E17 065 D III Rint -327 | neg | neg | neg | neg | neg | neg | pos | neg | pos | pos | neg | pos | pos | pos | pos | neg | pos | neg | neg | neg |
| 38 | 18Encdc Lag Rint - 4      | neg | neg | neg | neg | neg | neg | pos | neg | pos | pos | neg | pos | pos | pos | pos | neg | pos | neg | neg | neg |
| 39 | 18Encdc Lag Rint - 18     | neg | neg | neg | pos | neg | neg | pos | neg | pos | pos | neg | pos | pos | pos | pos | neg | pos | neg | pos | pos |
| 40 | 19E Rxv BAA Axm Rint - 58 | pos | neg | neg | pos | neg | neg | pos | neg | pos | pos | neg | pos | pos | pos | pos | neg | pos | neg | pos | pos |
| 41 | 19E Rxv BAA Axm Rint - 65 | pos | neg | neg | pos | neg | neg | pos | neg | pos | pos | neg | pos | pos | pos | pos | neg | pos | neg | pos | pos |
| 42 | 19E Rxv BAA Axm Rint - 71 | neg | neg | neg | neg | neg | neg | pos | neg | pos | pos | neg | pos | pos | pos | pos | neg | pos | neg | neg | neg |
| 43 | 19E17 065 D IV Rint -24   | neg | neg | neg | pos | neg | neg | pos | neg | pos | pos | neg | pos | pos | pos | pos | neg | pos | neg | pos | pos |

|    |                             |     |     |     |     |     |     |     |     |     |     |     |     |     |     |     |     |     |     |     |     |
|----|-----------------------------|-----|-----|-----|-----|-----|-----|-----|-----|-----|-----|-----|-----|-----|-----|-----|-----|-----|-----|-----|-----|
| 44 | 19E17 065 D IV Rint -28     | neg | neg | neg | neg | neg | neg | pos | neg | pos | pos | neg | pos | pos | pos | pos | neg | pos | neg | neg | neg |
| 45 | 19E Kh P0094 Rint - 26      | neg | neg | neg | neg | neg | neg | pos | neg | pos | pos | neg | pos | pos | pos | pos | neg | pos | neg | neg | neg |
| 46 | 19E Kh P0094 Rint - 6       | pos | neg | neg | pos | neg | neg | pos | neg | pos | pos | neg | pos | pos | pos | pos | neg | pos | neg | pos | pos |
| 47 | 19E Ambr P0094 II Rint - 28 | pos | neg | neg | pos | neg | neg | pos | neg | pos | pos | neg | pos | pos | pos | pos | neg | pos | neg | pos | pos |
| 48 | 19E Ambr P0094 II Rint - 27 | neg | neg | neg | neg | neg | neg | pos | neg | pos | pos | neg | pos | pos | pos | pos | neg | pos | neg | neg | neg |
| 49 | 19E Ambr P0094 II Rint - 37 | neg | neg | neg | pos | neg | neg | pos | neg | pos | pos | neg | pos | pos | pos | pos | neg | pos | neg | pos | pos |
| 50 | 19E Ambr P0094 II Rint - 35 | neg | neg | neg | pos | neg | neg | pos | neg | pos | pos | neg | pos | pos | pos | pos | neg | pos | neg | pos | pos |
| 51 | 19E Ambr P0094 II Rint - 34 | neg | neg | neg | neg | neg | neg | pos | neg | pos | pos | neg | pos | pos | pos | pos | neg | pos | neg | neg | neg |
| 52 | 19E Ambr P0094 II Rint - 46 | neg | neg | neg | neg | neg | neg | pos | neg | pos | pos | neg | pos | pos | pos | pos | neg | pos | neg | neg | neg |
| 53 | 19E Ambr P0094 II Rint - 52 | pos | neg | neg | pos | neg | neg | pos | neg | pos | neg | neg | pos | pos | pos | pos | neg | pos | neg | pos | pos |

---



**Table S2.** Presence of the classical virulence-associated genes of *Yersinia enterocolitica* in the strains from Georgia sequenced in this study.

| Gene/ Function                                                                   | 18E17 065 D I<br>Rint-91 &<br>18E17 065 D I<br>Rint-95 | B18 Rint -<br>231 | 18E17 065<br>D I -33 | LcENCDC<br>Rint 5 | 18ENCDC AsAtc<br>Rint - 11-12 |
|----------------------------------------------------------------------------------|--------------------------------------------------------|-------------------|----------------------|-------------------|-------------------------------|
| <i>ystB</i> / Heat-stable enterotoxin type B                                     | +                                                      | +                 | +                    | +                 | +                             |
| <i>inv</i> / Invasin                                                             | +                                                      | +                 | +                    | —                 | —                             |
| <i>myfA</i> / Fimbrial protein MyfA                                              | —                                                      | +                 | —                    | +                 | +                             |
| <i>ymoA</i> / Modulator of expression for<br>virulence functions                 | +                                                      | +                 | +                    | +                 | +                             |
| <i>ytxA</i> / ADP-ribosyltransferase<br>Pertussis-like toxin                     | +                                                      | +                 | —                    | +                 | +                             |
| <i>hreP</i> ( <i>prcA</i> )/ In vivo-expressed<br>subtilisin/kexin-like protease | —                                                      | +                 | —                    | +                 | +                             |
| <i>fepBDGC</i> / Ferric enterobactin<br>transport system                         | +                                                      | +                 | +                    | +                 | +                             |
| <i>rtxA</i> / RtxA-like putative leukotoxin                                      | —                                                      | +                 | —                    | +                 | +                             |
| <i>cdtB</i> / Cytolethal distending toxin<br>subunit B-like protein              | —                                                      | +                 | —                    | +                 | +                             |
| <i>hemPR-hmuVSTU</i> / Direct heme<br>uptake system                              | +                                                      | +                 | +                    | +                 | +                             |
| <i>yax</i> / pore-forming cytotoxin<br>Cytotoxin YaxAB                           | +                                                      | +                 | +                    | +                 | +                             |
| <i>phlA</i> ( <i>yplA</i> )/ Phospholipase A<br>homolog                          | +                                                      | +                 | +                    | +                 | +                             |
| <i>pldA</i> / Phospholipase A1                                                   | +                                                      | +                 | +                    | +                 | +                             |
| <i>flg</i> / Flagella cluster I                                                  | +                                                      | +                 | +                    | +                 | +                             |
| <i>arsCBR</i> / Arsenic cluster                                                  | +                                                      | +                 | +                    | +                 | +                             |
| <i>ysfI</i> / Type 2 secretion                                                   | +                                                      | +                 | +                    | +                 | +                             |
| <i>spiA</i> , <i>ssaV</i> - <i>ssaN</i> / Chromosomal<br>Type 3 secretion system | +                                                      | —                 | +                    | +                 | +                             |
| <i>virF</i> / Virulence regulon                                                  | —                                                      | —                 | —                    | —                 | —                             |

|                                                             |   |   |   |   |   |
|-------------------------------------------------------------|---|---|---|---|---|
| transcriptional activator                                   |   |   |   |   |   |
| pYV plasmid/ Virulence plasmid<br>encoding Type 3 secretion | — | — | — | — | — |
| <i>yltA</i> / heat-labile enterotoxin, A chain              | — | — | + | — | — |
| <i>ystA</i> / Heat-stable Enterotoxin type A                | — | — | — | — | — |
| <i>ail</i> / Attachment invasion locus<br>protein (adhesin) | — | — | — | — | — |
| <i>vapBC</i> / type II toxin–antitoxin<br>systems           | + | + | + | + | — |
| <i>vapC</i> / tRNA(fMet)-specific<br>endonuclease VapC      | + | — | + | — | — |
| <i>tccC</i> / Insecticidal toxin                            | — | — | — | — | — |
| plasmids                                                    | 4 | 0 | 2 | 0 | 0 |

The plus and minus signs represent presence or absence of the genes.
